# Supplementary material for: 1,25(OH)2D3 Differently Modulates the Secretory Activity of IFN-DC and IL4-DC: A Study in Cells from Healthy Donors and MS Patients
Source: MDPI journal article supplement (doi:10.3390/ijms24076717), 2023-04-04
Supplement: s1 [file s1]

## Supplementary materials

### Supplementary Table S1

Demographic and clinical characteristics of donor groups.

|                                         | MS            | MS-I            | H              |
|-----------------------------------------|---------------|-----------------|----------------|
| No of subjects                          | 13            | 13              | 20             |
| Age (years; mean $\pm$ SD)              | 37.3 $\pm$ 6  | 34.3 $\pm$ 10.3 | 41.1 $\pm$ 9.4 |
| Females/males (n)                       | 8/5           | 8/5             | 13/7           |
| EDSS <sup>1</sup> (mean $\pm$ SD)       | 0.9 $\pm$ 1.5 | 1.1 $\pm$ 2     | NA             |
| Disease duration (years; mean $\pm$ SD) | 6.3 $\pm$ 5.3 | 5.4 $\pm$ 4.5   | NA             |

Information about age was missing for two healthy donors. NA not applicable <sup>1</sup> EDSS Expanded Disability Status Scale

### Supplementary Table S2-legend

Anova reports of the sample sets in Figures 3-6. Sum of Squares, Degrees of Freedom, Mean Squares, F (DFn, DFd) and P values of the sources of variation are reported for each soluble mediator analyzed in culture supernatants of IFN-DC (sheet 1) and IL4-DC (sheet 2).

### Supplementary Figure S1-legend

**Figure S1. IL1 $\beta$  secretion.** IL1 $\beta$  concentrations measured in IFN-DC (A) and IL4-DC (B) supernatants from H, MS and MS-I donors are shown as individual values. Number of subjects (n) analyzed are indicated. Black dots represent untreated cells, pink squares represent 1,25(OH)<sub>2</sub>D3 treated cells.
